# Supplementary material for: Elevated basophil count is associated with increased odds of endometriosis
Source: PubMed Central journal article supplement — Reprod Fertil. 2024 Aug 7;5(3):e230090. doi: 10.1530/RAF-23-0090 (PMC11378143; doi:10.1530/raf-23-0090), 2024-08-07
Supplement: supplementary_table_1a.pdf [file supplementary_table_1a.pdf]

Supplementary Table 1A. Categorization of self-reported sex hormone use in the past three months based on their pharmacological components

| <b>Progestogen-only pill (POP)</b> | <b>Combined oral contraceptive pill (COCP)</b> | <b>Gonadotropin-releasing hormone agonist (GnRH-a)</b> |
|------------------------------------|------------------------------------------------|--------------------------------------------------------|
| Cerazette                          | Cedarel                                        | Zoladex                                                |
| Progesterone only pill-<br>Noriday | Microgynon                                     | Decapeptyl triptorelin                                 |
| Nexplanon                          | Trinovum                                       | Prostap                                                |
| Depo/depo provera                  | Milinette                                      | Danazol                                                |
| Desogestrel                        | Combined pill                                  |                                                        |
| Dienogest(visanne)                 | Gedarel                                        |                                                        |
| Micronor                           | HRT                                            |                                                        |
| Mirena                             | Loestrin 30                                    |                                                        |
| Cerelle                            | Ovranette                                      |                                                        |
| Implanon                           | Rigevidon                                      |                                                        |
| Norethisterone                     | Cilest                                         |                                                        |
| Provera tablets                    | Femodene                                       |                                                        |
| Feonella (is desogestrel)          | Norimin                                        |                                                        |
| Mini desogestrel                   | Millinette                                     |                                                        |
|                                    | Femodene                                       |                                                        |
|                                    | Yasmin                                         |                                                        |
|                                    | Nuva ring                                      |                                                        |
