# Supplementary material for: Elevated basophil count is associated with increased odds of endometriosis
Source: PubMed Central journal article supplement — Reprod Fertil. 2024 Aug 7;5(3):e230090. doi: 10.1530/RAF-23-0090 (PMC11378143; doi:10.1530/raf-23-0090), 2024-08-07
Supplement: supplementary_table_2a.pdf [file supplementary_table_2a.pdf]

**Supplementary Table 2A. Surgeries that could provide evidence for endometriosis diagnosis.**

| Self-report Records | Hospital Records                                | ICD10 | ICD9 | Meaning                                                                    |      |
|---------------------|-------------------------------------------------|-------|------|----------------------------------------------------------------------------|------|
| Code                | Meaning                                         | Tier  | Code | Meaning                                                                    | Tier |
| 1429                | cystectomy                                      | 1     | Q07  | Abdominal excision of uterus                                               | 1    |
| 1505                | ovarian/tubal surgery                           | 1     | Q074 | Total abdominal hysterectomy NEC                                           | 1    |
| 1506                | ovarian cyst removal/surgery                    | 1     | Q075 | Subtotal abdominal hysterectomy                                            | 1    |
| 1520                | laparoscopy                                     | 1     | Q078 | Other specified abdominal excision of uterus                               | 1    |
| 1354                | gynaecological surgery                          | 2     | Q079 | Unspecified abdominal excision of uterus                                   | 1    |
| 1355                | bilateral oophorectomy                          | 2     | Q092 | Open myomectomy                                                            | 1    |
| 1356                | unilateral oophorectomy                         | 2     | Q093 | Open excision of lesion of uterus NEC                                      | 1    |
| 1357                | hysterectomy                                    | 2     | Q094 | Open biopsy of lesion of uterus                                            | 1    |
| 1358                | hysterectomy with oophorectomy                  | 2     | Q098 | Other specified other open operations on uterus                            | 1    |
| 1359                | hysterectomy with cervical sparing intrauterine | 2     | Q01  | Excision of cervix uteri                                                   | 2    |
| 1363                | contraceptive device insertion/removal          | 2     | Q011 | Amputation of cervix uteri                                                 | 2    |
| 1475                | fertility treatment procedures                  | 2     | Q013 | Excision of lesion of cervix uteri                                         | 2    |
| 1485                | abdominal/pelvic adhesion surgery               | 2     | Q019 | Unspecified excision of cervix uteri                                       | 2    |
| 1508                | uterine surgery                                 | 2     | Q09  | Other open operations on uterus                                            | 2    |
| 1509                | myomectomy/fibroids removed                     | 2     | Q099 | Unspecified other open operations on uterus                                | 2    |
| 1510                | dilatation and curettage/d+c                    | 2     | Q103 | Dilation of cervix uteri and curettage of uterus NEC                       | 2    |
| 1519                | colonoscopy/sigmoidoscopy                       | 2     | Q108 | Other specified curettage of uterus                                        | 2    |
| 1521                | hysteroscopy +/- biopsy                         | 2     | Q109 | Unspecified curettage of uterus                                            | 2    |
| 1538                | salpingectomy                                   | 2     | Q12  | Intrauterine contraceptive device                                          | 2    |
| 1600                | mri / magnetic resonance imaging                | 2     | Q121 | Introduction of intrauterine contraceptive device                          | 2    |
| 1606                | genito-urinary investigation                    | 2     | Q122 | Replacement of intrauterine contraceptive device                           | 2    |
| 1607                | ct scan                                         | 2     | Q179 | Unspecified therapeutic endoscopic operations on uterus                    | 2    |
| 1609                | ultrasound scan                                 | 2     | Q18  | Diagnostic endoscopic examination of uterus                                | 2    |
| 1199                | ureteric surgery                                | 3     | Q181 | Diagnostic endoscopic examination of uterus and biopsy of lesion of uterus | 2    |
| 1427                | bladder surgery                                 | 3     | Q188 | Other specified diagnostic endoscopic examination of uterus                | 2    |
| 1461                | large bowel resection +/- colostomy             | 3     | Q189 | Unspecified diagnostic endoscopic examination of uterus                    | 2    |

|      |                                          |   |      |                                                             |   |
|------|------------------------------------------|---|------|-------------------------------------------------------------|---|
| 1462 | small bowel resection                    | 3 | Q232 | Opening of abdomen                                          | 2 |
| 1465 | rectal/sigmoid resection                 | 3 | Q233 | Other specified opening of abdomen                          | 2 |
| 1466 | other bowel surgery                      | 3 | Q234 | Unspecified opening of abdomen                              | 2 |
| 1486 | laparotomy nos                           | 3 | Q221 | Excision of lesion of broad ligament of uterus              | 2 |
| 1488 | anterior/posterior repair bladder/uterus | 3 | Q242 | Ultrasound of abdomen                                       | 2 |
| 1547 | cystoscopy                               | 3 | Q243 | Magnetic resonance imaging of abdomen                       | 2 |
| 1570 | ileostomy surgery                        | 3 | Q248 | Other specified diagnostic imaging of abdomen               | 2 |
| 1574 | colostomy surgery                        | 3 | Q249 | Unspecified diagnostic imaging of abdomen                   | 2 |
| 1577 | anterior resection                       | 3 | Q25  | Diagnostic imaging of pelvis                                | 2 |
| 1621 | cystoscopy                               | 3 | Q251 | Computed tomography of pelvis                               | 2 |
|      |                                          |   | Q258 | Ultrasound of pelvis                                        | 2 |
|      |                                          |   | Q259 | Magnetic resonance imaging of pelvis                        | 2 |
|      |                                          |   | Q27  | Other specified diagnostic imaging of pelvis                | 2 |
|      |                                          |   | Q271 | Unspecified diagnostic imaging of pelvis                    | 2 |
|      |                                          |   | Q201 | Freeing of adhesions of uterus                              | 3 |
|      |                                          |   | Q22  | Operations on broad ligament of uterus                      | 3 |
|      |                                          |   | Q222 | Destruction of lesion of broad ligament of uterus           | 3 |
|      |                                          |   | Q223 | Other specified operations on broad ligament of uterus      | 3 |
|      |                                          |   | Q228 | Unspecified operations on broad ligament of uterus          | 3 |
|      |                                          |   | Q229 | Operations on other ligament of uterus                      | 3 |
|      |                                          |   | Q23  | Other specified other operations on female genital tract    | 3 |
|      |                                          |   | Q231 | Unspecified other operations on female genital tract        | 3 |
|      |                                          |   | Q235 | Other operations on anterior abdominal wall                 | 3 |
|      |                                          |   | Q236 | Biopsy of lesion of anterior abdominal wall                 | 3 |
|      |                                          |   | Q238 | Excision of lesion of anterior abdominal wall NEC           | 3 |
|      |                                          |   | Q239 | Destruction of lesion of anterior abdominal wall            | 3 |
|      |                                          |   | Q24  | Other specified other operations on anterior abdominal wall | 3 |
|      |                                          |   | Q241 | Unspecified other operations on anterior abdominal wall     | 3 |
