# Supplementary material for: Elevated basophil count is associated with increased odds of endometriosis
Source: PubMed Central journal article supplement — Reprod Fertil. 2024 Aug 7;5(3):e230090. doi: 10.1530/RAF-23-0090 (PMC11378143; doi:10.1530/raf-23-0090), 2024-08-07
Supplement: supplementary_table_2b.pdf [file supplementary_table_2b.pdf]

**Supplementary Table 2B. ICD9, ICD10 code to subset endometriosis cases from hospital data.**

|      |      |                                                 |
|------|------|-------------------------------------------------|
| N800 | 6170 | Endometriosis of uterus                         |
| N801 | 6171 | Endometriosis of ovary                          |
| N802 | 6172 | Endometriosis of Fallopian tube                 |
| N803 | 6173 | Endometriosis of pelvic peritoneum              |
| N804 | 6174 | Endometriosis of rectovaginal septum and vagina |
| N805 | 6175 | Endometriosis of intestine                      |
| N806 | 6176 | Endometriosis in cutaneous scar                 |
| N808 | 6178 | Other endometriosis                             |
| N809 | 6179 | Endometriosis, unspecified                      |
