# Supplementary figures and images for: Elevated basophil count is associated with increased odds of endometriosis
Source: PubMed Central journal article supplement — Reprod Fertil. 2024 Aug 7;5(3):e230090. doi: 10.1530/RAF-23-0090 (PMC11378143; doi:10.1530/raf-23-0090), 2024-08-07

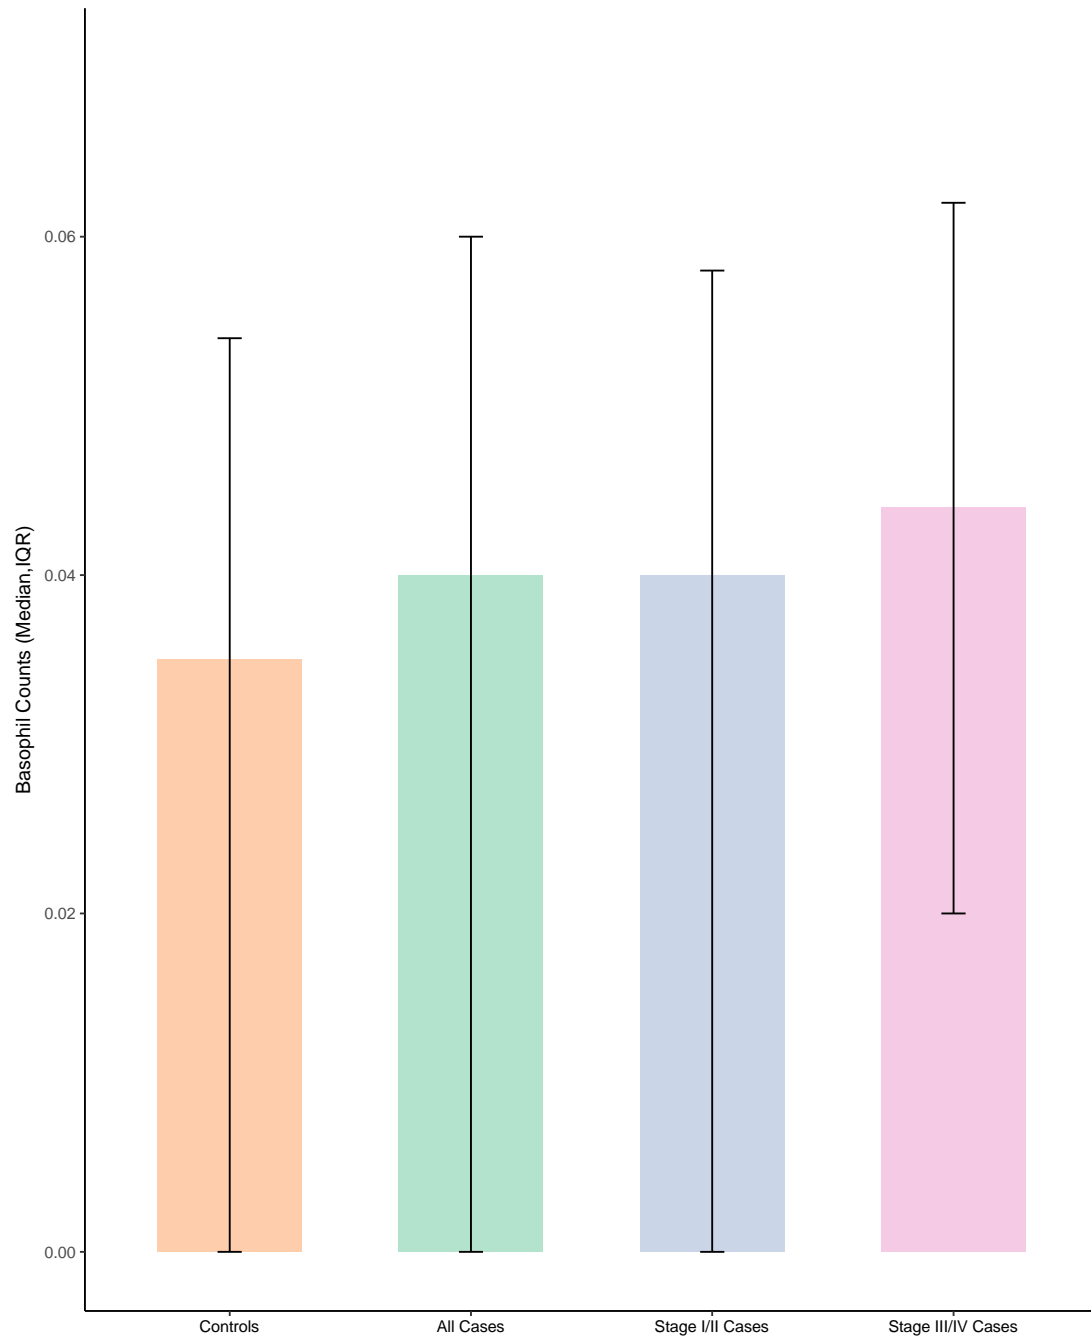

Supplement: supplementary_figure_1a.pdf [file supplementary_figure_1a.pdf]

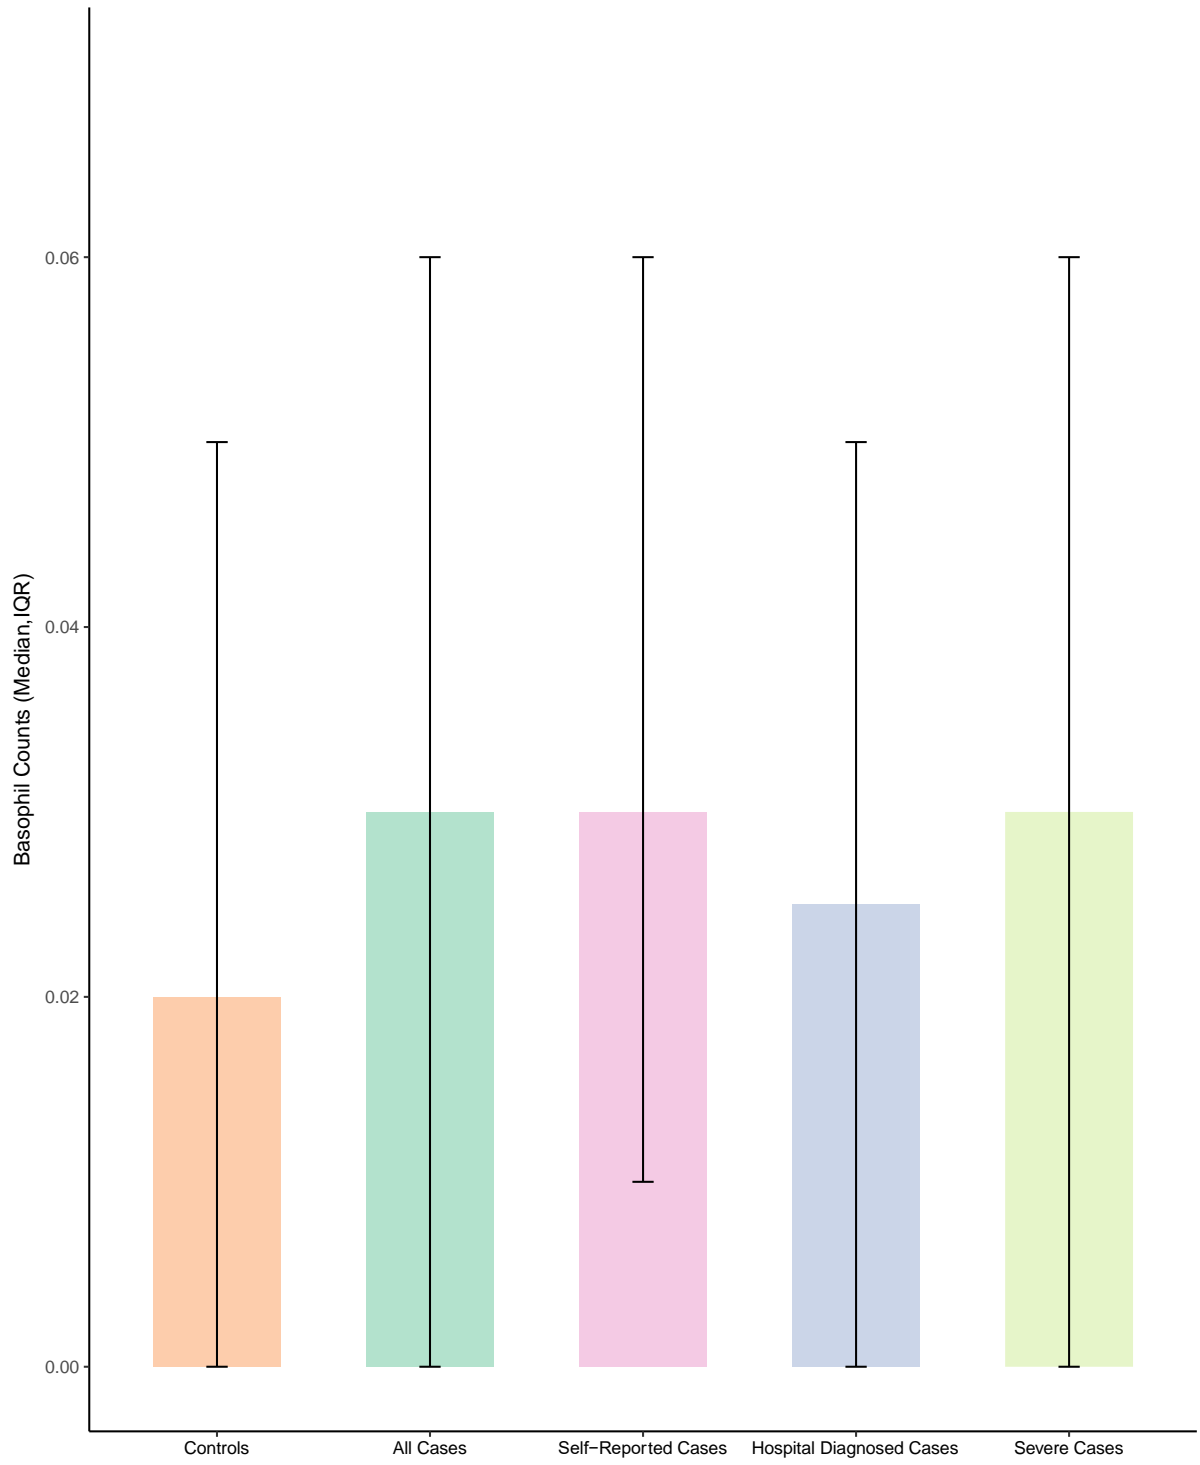

Supplement: supplementary_figure_1b.pdf [file supplementary_figure_1b.pdf]

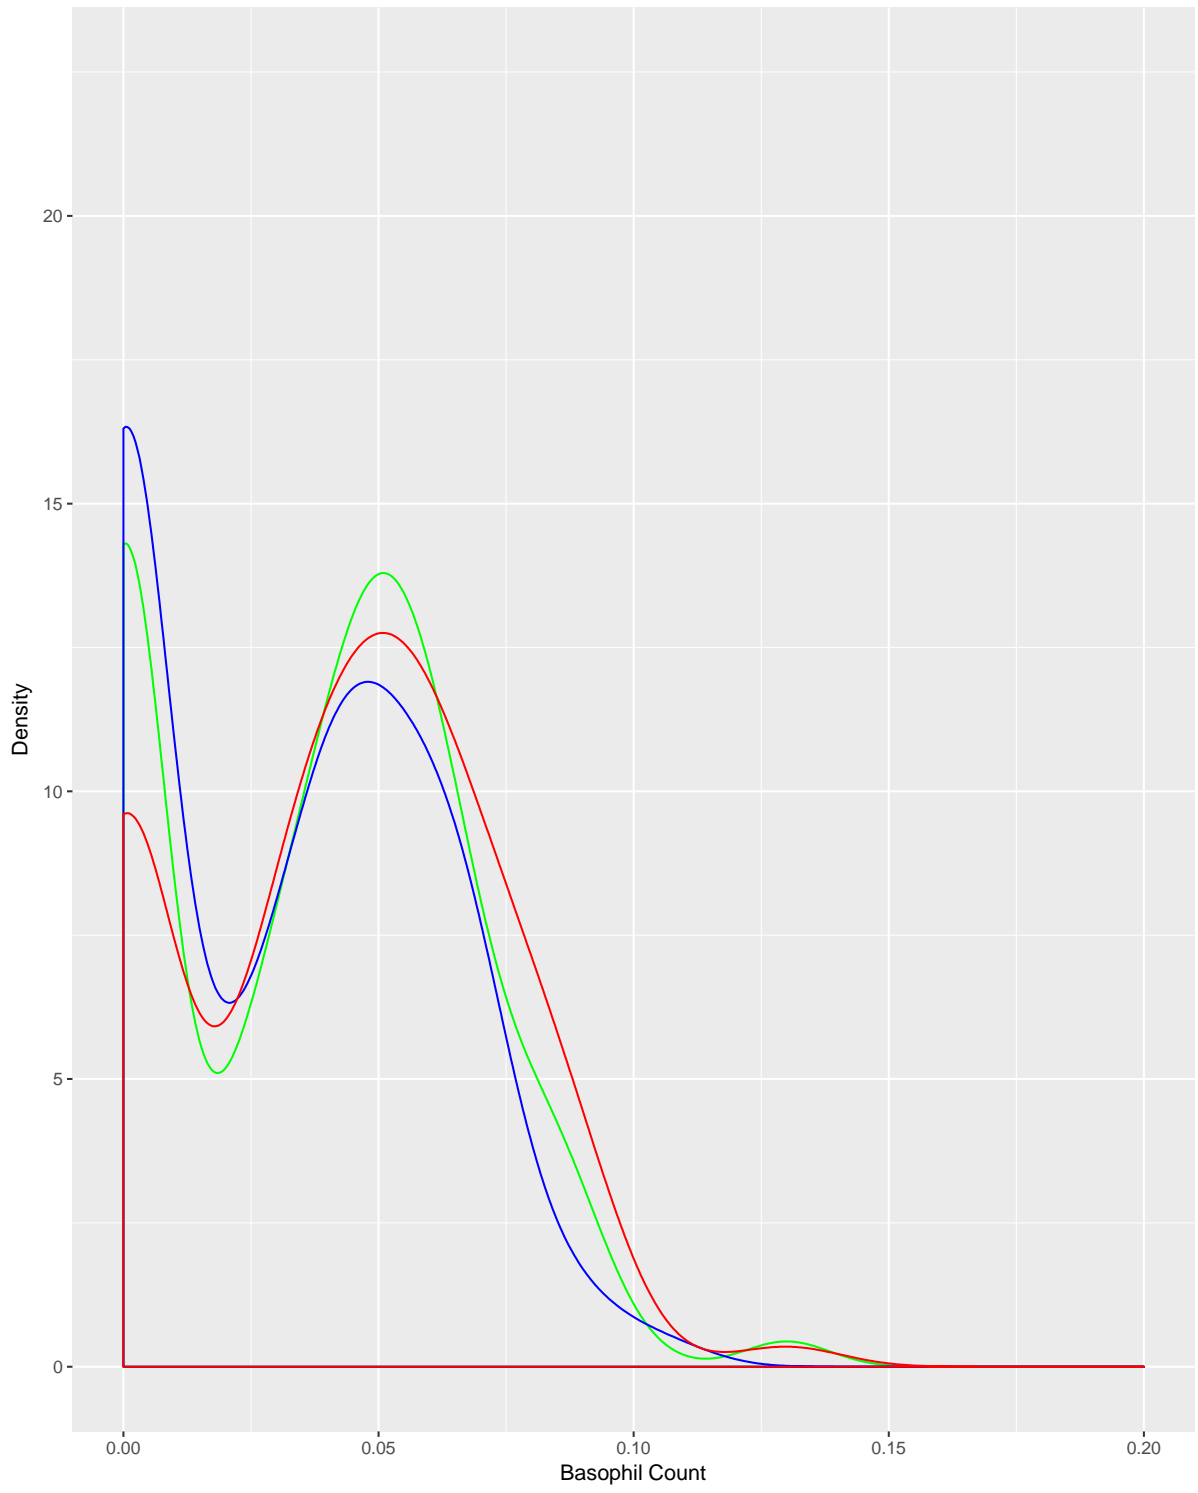

Supplement: supplementary_figure_2a.pdf [file supplementary_figure_2a.pdf]

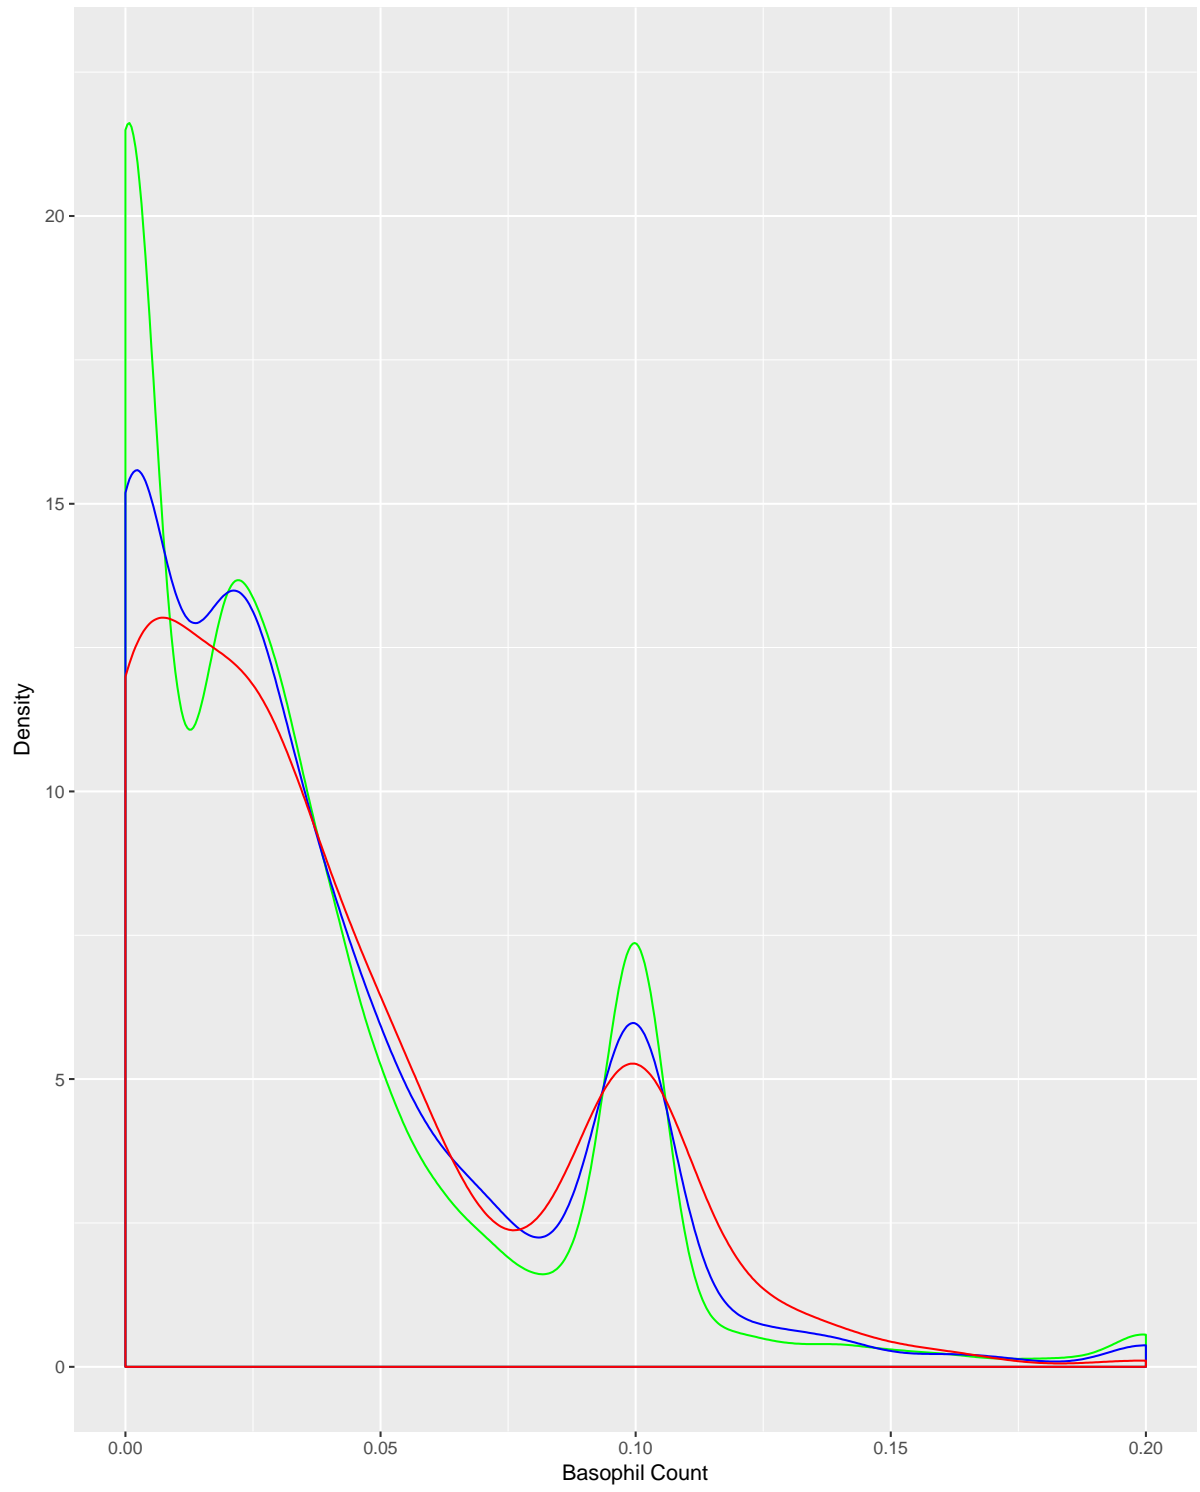

Supplement: supplementary_figure_2b.pdf [file supplementary_figure_2b.pdf]
